# Supplementary material for: Enhancing the hydrostability and catalytic performance of metal–organic frameworks by hybridizing with attapulgite, a natural clay
Source: Royal Society of Chemistry journal article supplement (doi:10.1039/c5ta00959f), 2015-01-01
Supplement: c5ta00959f1.pdf [file c5ta00959f1.pdf]

## Supporting Information

### **Enhancing Hydrostability and Catalytic Performance of MOF-5 by Hybridizing with Attapulgite, A Natural Clay**

Lei Lu, Xing-Yang Li, Xiao-Qin Liu,\* Zhi-Min Wang, and Lin-Bing Sun\*

State Key Laboratory of Materials-Oriented Chemical Engineering, College of Chemistry and Chemical Engineering, Nanjing Tech University, Nanjing 210009, China

\*Corresponding author. E-mail: liuxq@njtech.edu.cn; lbsun@njtech.edu.cn.

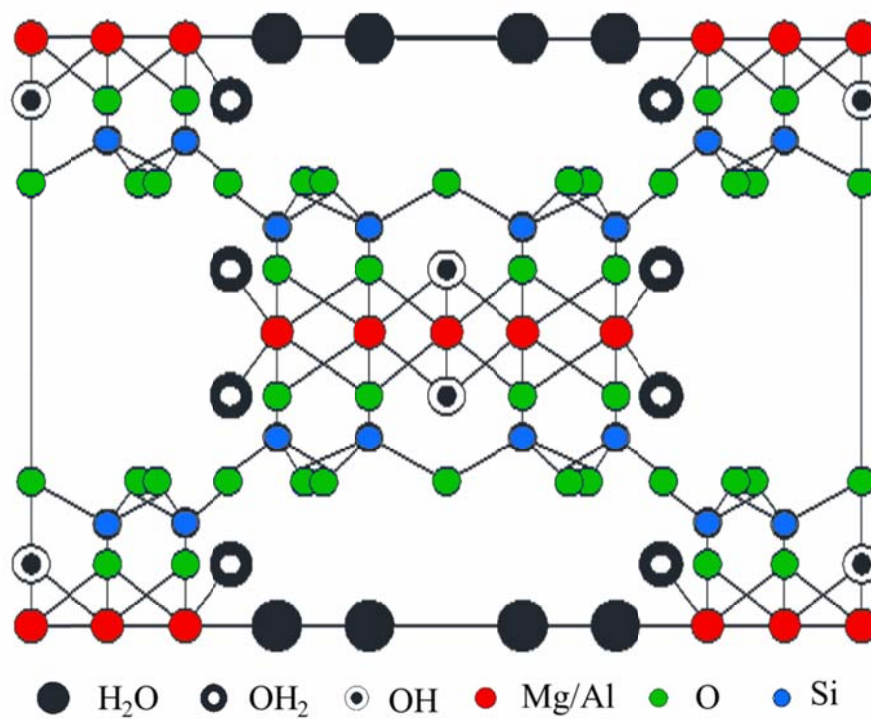

**Fig. S1** Crystal structure of attapulgite.

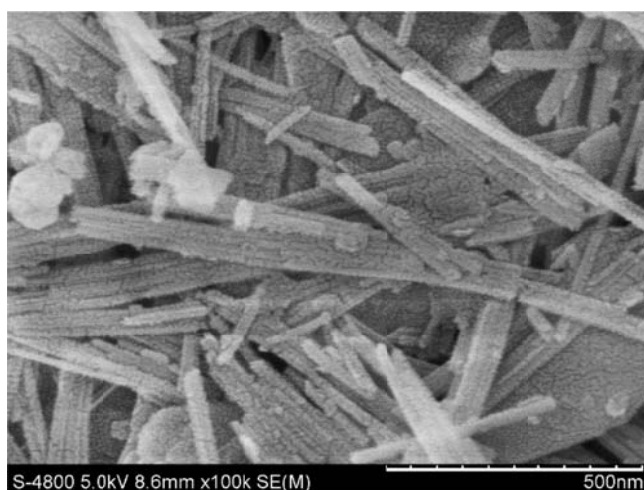

**Fig. S2** A typical SEM image of attapulgite.

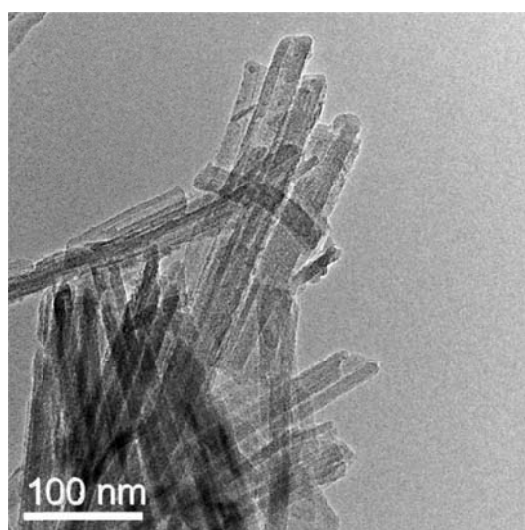

**Fig. S3** A typical TEM image of attapulgite.

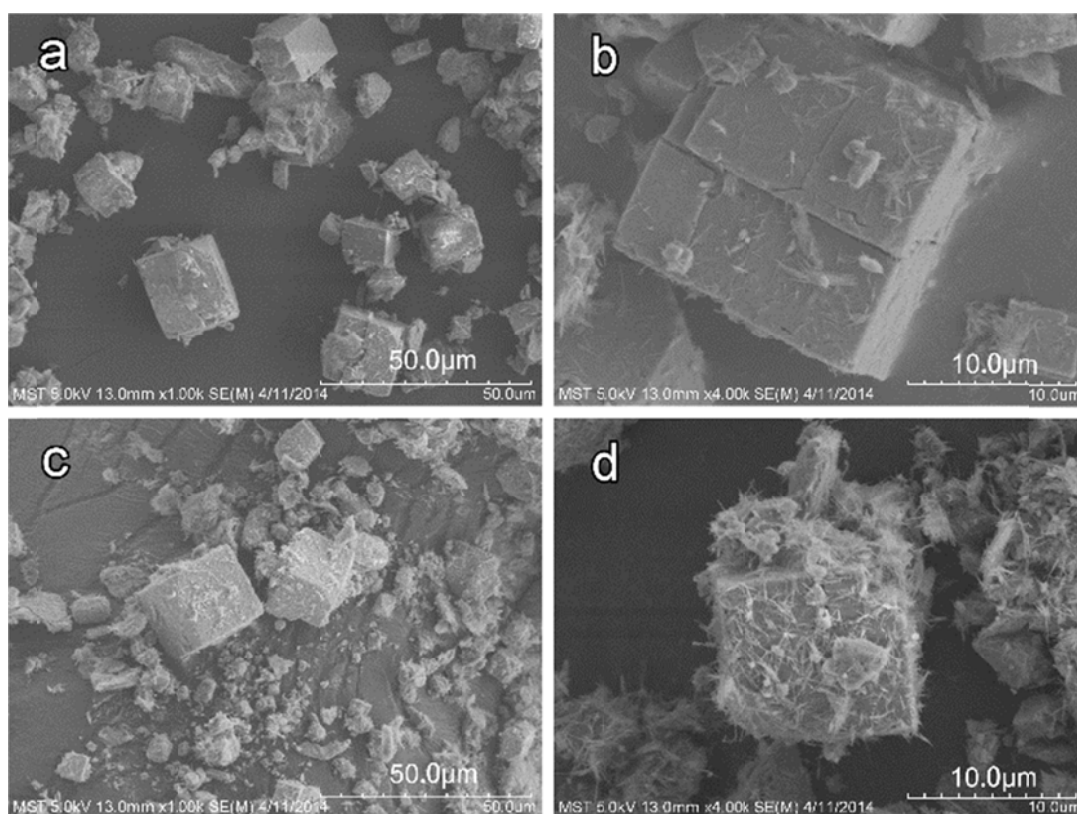

**Fig. S4** SEM images of (a, b) MA-2 and (c, d) MA-4.

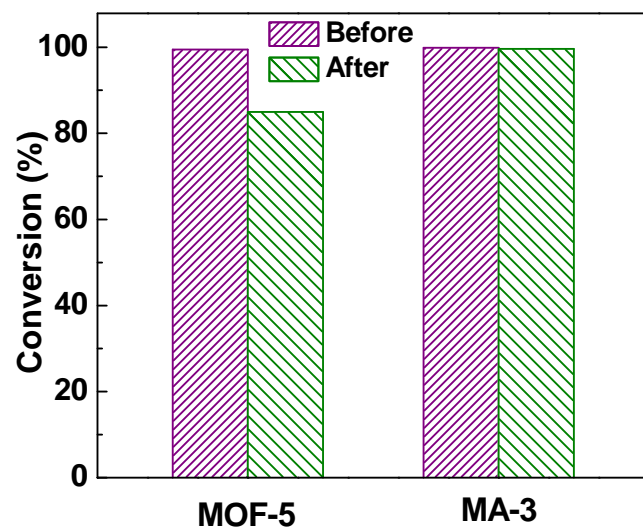

**Fig. S5** Friedel-Crafts alkylation of benzyl bromide with toluene over MOF-5 and MA-3 before and after exposure to humid atmosphere for 3 h.

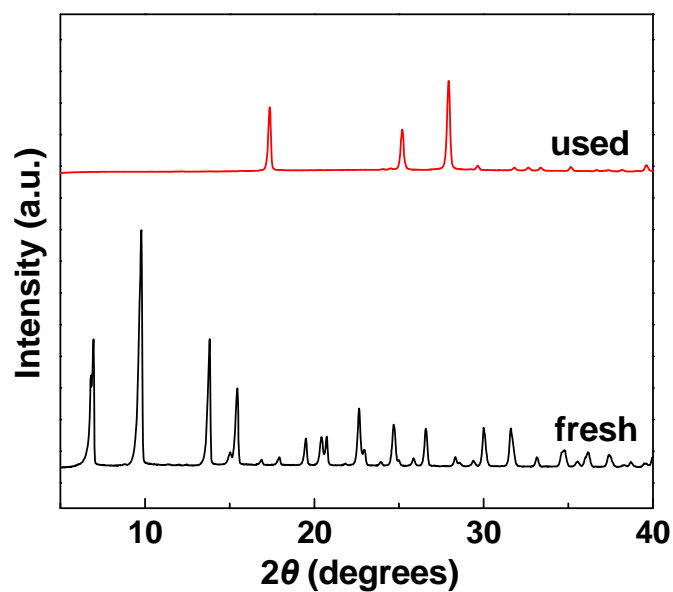

**Fig. S6** XRD patterns of the fresh catalyst MOF-5 and the catalyst recovered after six runs.

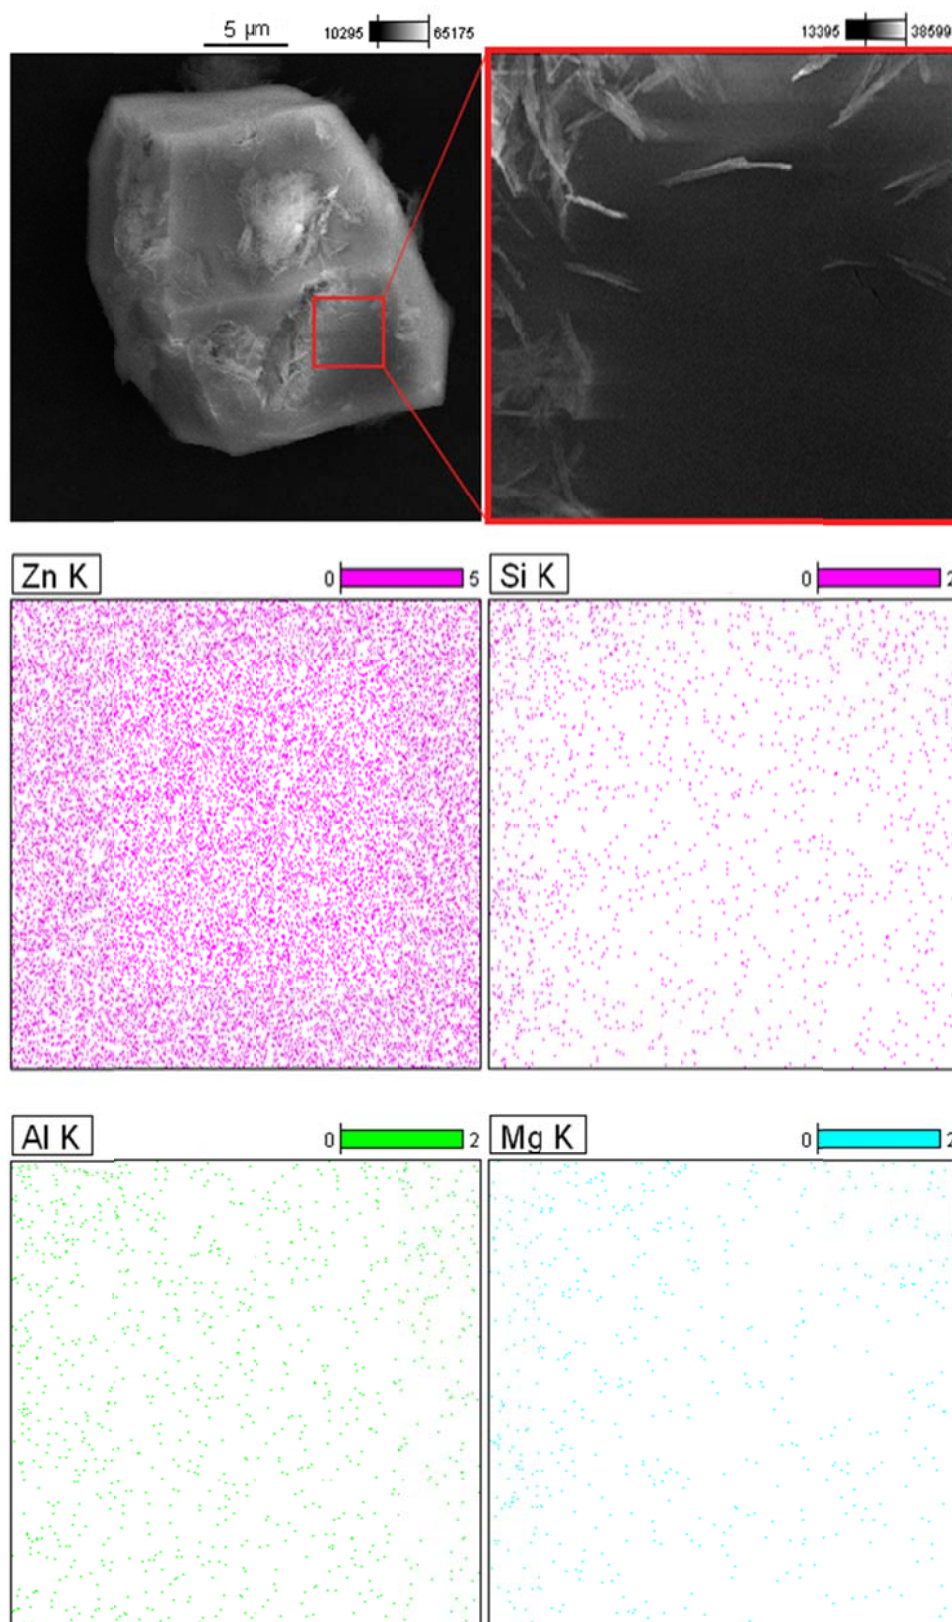

**Fig. S7** Elemental mapping of the hybrid material MA-3.

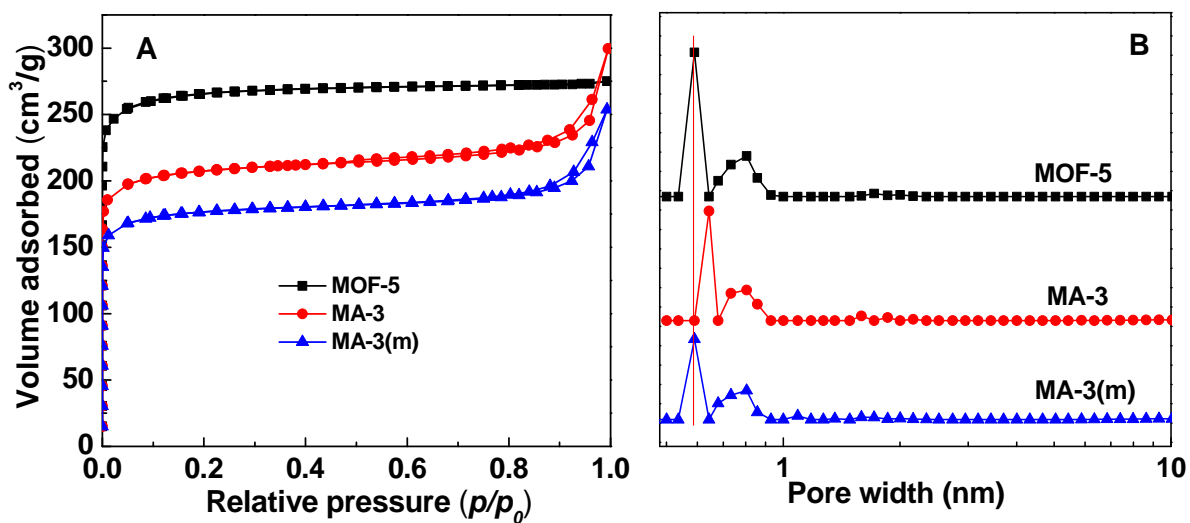

**Fig. S8** (A) N<sub>2</sub> adsorption-desorption isotherms at 77 K and (B) pore size distributions of MOF-5, MA-3, and MA-3(m).

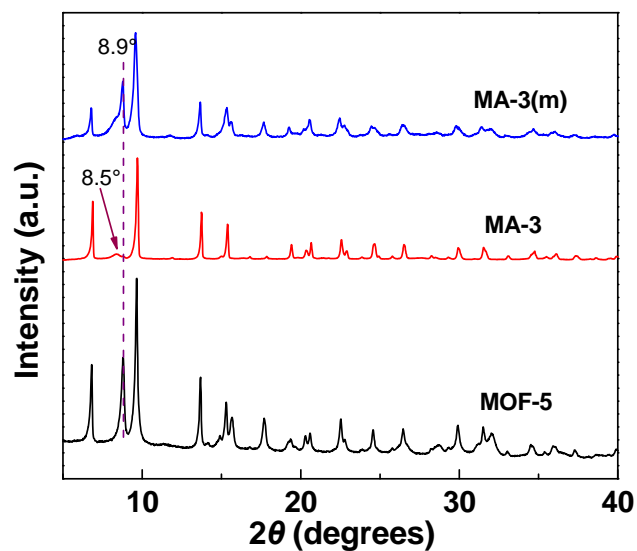

**Fig. S9** XRD patterns of MOF-5, MA-3, and MA-3(m) after exposure to humid atmosphere for 3 h.
